# Supplementary material for: Growth-factor-mediated coupling between lineage size and cell fate choice underlies robustness of mammalian development
Source: eLife. 2020 Jul 28;9:e56079. doi: 10.7554/eLife.56079 (PMC7513828; doi:10.7554/eLife.56079)
Supplement: Supplementary file 1. [file elife-56079-supp1.xlsx]

## Sheet: Sheet1
Allele	Reference
CAG:H2B-GFP	Hadjantonakis and Papaioannou, 2004
Fgf4 flox	Sun et al, 2000
Fgf4 ko
Gata4 ko	Watt et al, 2004
Gata6 flox	Sodhi et al, 2006
Gata6 ko
Gdf9iCre	Lan et al, 2004
Nanogbeta-geo	Mitsui et al, 2003
PdgraH2B-GFP	Hamilton et al, 2003
ROSA26:CAG-3x-nls-mKate2	Susaki et al, 2014
Spry4H2B-Venus	Morgani et al, 2018
Zp3Cre	Lewandoski et al, 1997
