# Supplementary material for: Growth-factor-mediated coupling between lineage size and cell fate choice underlies robustness of mammalian development
Source: eLife. 2020 Jul 28;9:e56079. doi: 10.7554/eLife.56079 (PMC7513828; doi:10.7554/eLife.56079)
Supplement: Supplementary file 2. [file elife-56079-supp2.xlsx]

## Sheet: Sheet1
Allele	Sample type	Primer	Sequence
Fgf4 flox	Mouse + embryo	FGF flox R1	CTCCAGCTTAGTCACCAG
		FGF flox F2	GCACGTTGCTTGTAGCCA
Fgf4 ko	Mouse	FGF F1	ATCGGATTCCACCTGCAGGTGCT
		FGF F2	CACGTTGCTTGTAGCCACTGGAAC
		FGF R1	TCCTGCAGTCTGCCTGCATAAAGG
	Embryo	FGF F1	ATCGGATTCCACCTGCAGGTGCT
		FGF F2	CACGTTGCTTGTAGCCACTGGAAC
		FGF R1	TCCTGCAGTCTGCCTGCATAAAGG
		FGF F3	ATCGGTGGTGTGCACGCAGA
		FGF F4	AGAGGAACTAGGAATGGACA
		FGF R2	GCAGCTCACCCTTAAATTATG
Fgf4 ko (Goldfarb)	Cells	FGF4 ex1	TCAAAAGGCTTCGGCGGCT
		FGF4 ex2	GAGAGCTCCAGAAGACCTG
		FGF4 Neo	CGGGTGTTGGGTCGTTTGT
Gata4 ko	Mouse + embryo	Gata4KO_F	AAACGGAAGCCCAAGAACCTGAAT
		Gata4KO_R	GAGCTGGCCTGCGATGTCTGAGTG
Gata6 flox	Mouse + embryo	Gata6cKO_F	GTGGTTGTAAGGCGGTTTGT
		Gata6cKO_R	ACGCGAGCTCCAGAAAAAGT
Gata6 ko	Mouse + embryo	Gata6KO_F	AGTCTCCCTGTCATTCTTCCTGCTC
		Gata6KO_R	TGATCAAACCTGGGTCTACACTCCTA
Gdf9iCre	Mouse + embryo	iCre fwd	GGCATGCTTGAGGTCTGATTAC
		iCre rev	CAGGTTTTGGTGCACAGTCA
		IMR 7338	CTAGGCCACAGAATTGAAAGATCT
		IMR 7339	GTAGGTGGAAATTCTAGCATCATCC
Nanogbeta-geo	Mouse	LacZfwd	CATCCACGCGCGCGTACATC
		LacZrev	CCGAACCATCCGCTGTGGTAC
	Embryo	ns83_bgeo_fw	AATGGGCTGACCGCTTCCTCGTGCTT
		ns84_nanog_fw	AGTACCTCAGCCTCCAGCAGATGC
		ns85_nanog_rev	CAGAATGCAGACAGGTCTACAGCCCG
PdgraH2B-GFP	Mouse + embryo	Pdgfr_R4	CCCTTGTGGTCATGCCAAAC
		Pdgfr_R5	GCTTTTGCCTCCATTACACTGG
		Pdgfr_Lox	ACGAAGTTATTAGGTCCCTCGAC
ROSA26:CAG-3x-nls-mKate2	Mouse + embryo	R26WT_fwd	CAAAGTCGCTCTGAGTTGTTATCAG
		R26WT_rev	GGAGCGGGAGAAATGGATATGAAG
		mKate2_F	AGATCTGGTACTCGTATGGTGAGCGAGCTGATT
		mKate2_R	TGTGCCTGTAAGCTTTCTTCTGTGCCCCAGTTTGCT
Zp3Cre	Mouse + embryo	Cre1	TGATGGACATGTTCAGGGATC
		Cre2	CAGCCACCAGCTTGCATGA
		5'MBC	GATGTGCTCCAGGCTAAAGTT
		3'MBC	AGAAACCGAATGTTGTGGAGT
