# Supplementary material for: Growth-factor-mediated coupling between lineage size and cell fate choice underlies robustness of mammalian development
Source: eLife. 2020 Jul 28;9:e56079. doi: 10.7554/eLife.56079 (PMC7513828; doi:10.7554/eLife.56079)
Supplement: Supplementary file 3. [file elife-56079-supp3.xlsx]

## Sheet: Sheet1
Epitope	Host	Dilution	Company	Clone	Catalog #
CDX2	Mouse	1:200	Biogenex	CDX2-88	MU392A-UC
GATA4	rabbit	1:100	Santa Cruz	H112	sc-9053
GATA6	rabbit	1:500	Cell Signaling	D61E4	5851S
GATA6	goat	1:100	R&D		AF1700
Nanog	rat	1:100	eBioscience	eBioMLC-51	14-5761
Nanog	rabbit	1:500	ReproCELL		RCAB0002P-F
GFP	chicken	1:400	Aves
SOX2	rat	1:200	eBioscience		14-9811-82
SOX17	goat	1:100	R&D		AF1924
